# Supplementary material for: Insights into the Effects of Cancer Associated Mutations at the UPF2 and ATP-Binding Sites of NMD Master Regulator: UPF1
Source: PubMed Central journal article supplement (PMC6888360; doi:10.3390/ijms20225644), 2019-11-11
Supplement: ijms-20-05644-s001.pdf [file ijms-20-05644-s001.pdf]

# Supporting Materials

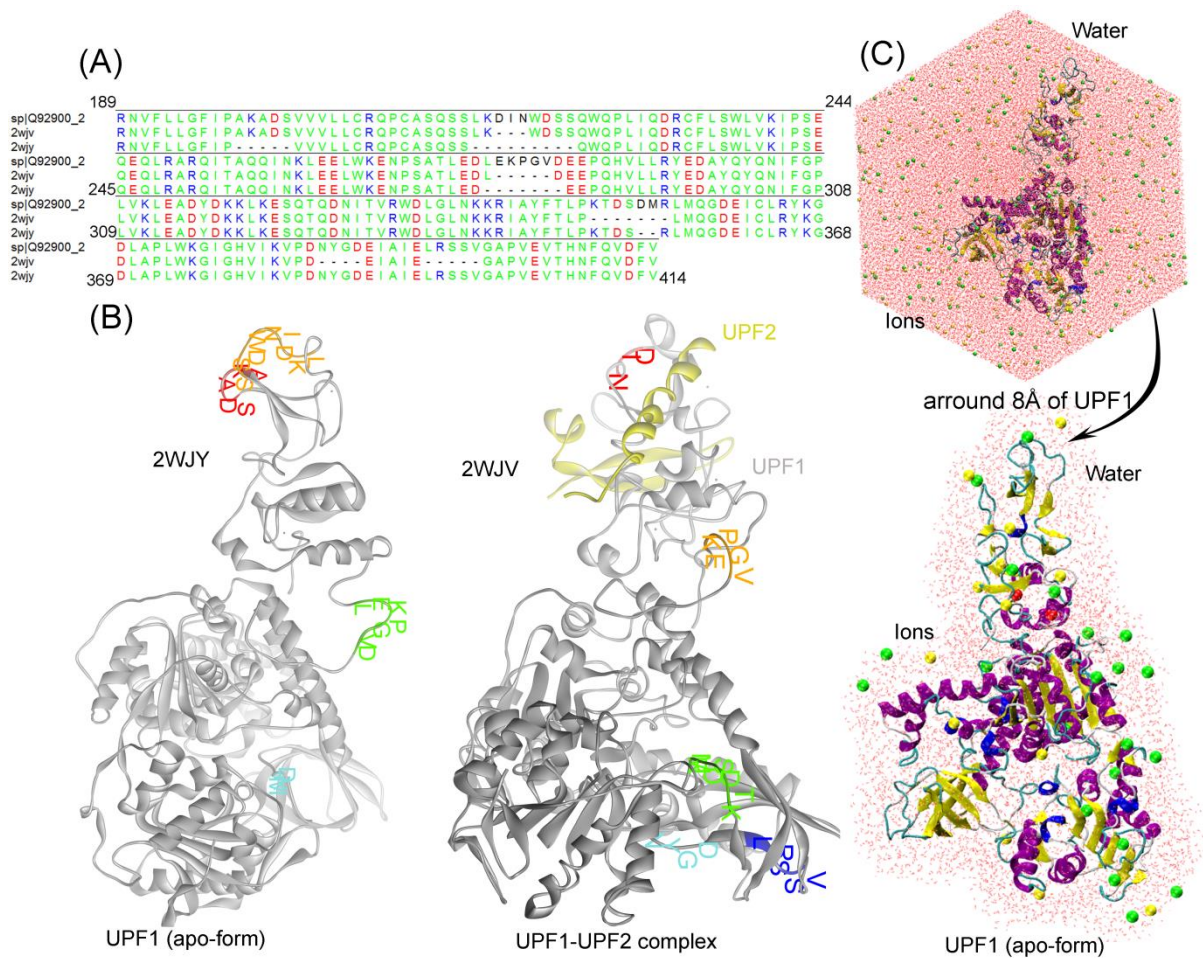

**Figure S1.** The UPF1 protein. **(A)** Structure-based sequence alignment of the UPF1 protein in the apo state (PDB: 2WJY) and in the UPF1-UPF2 complex (PDB: 2WJV). **(B)** Structures of the UPF1 protein with labelled missing residues that were inserted in the protein. **(C)** MDS system of the UPF1 apo-form; one cell in periodic boundary conditions (PBC) representing water and ions within 8 Å of the UPF1 protein.

**Table S1.** The UPF1 gene altered in different cancer types, data retrieved from the cBioPortal database (Cancer Discov.2012, 2, 401-404).

| <b>Cancer type</b>             | <b>Frequency genes altered; cases (%)</b> | <b>Total cases</b> |
|--------------------------------|-------------------------------------------|--------------------|
| Breast cancer                  | 89 (1.03%)                                | 8653               |
| Ovarian cancer                 | 86 (6.38%)                                | 1347               |
| Non-small cell lung cancer     | 69 (0.88%)                                | 7834               |
| Endometrial cancer             | 59 (4.1%)                                 | 1440               |
| Colorectal adenocarcinoma      | 48 (3.22%)                                | 1489               |
| Endometrial carcinoma          | 42 (7.17%)                                | 586                |
| Prostate cancer                | 40 (0.92%)                                | 4354               |
| Ovarian epithelial tumor       | 38 (6.5%)                                 | 585                |
| Melanoma                       | 38 (1.85%)                                | 2058               |
| Esophagogastric cancer         | 37 (1.59%)                                | 2323               |
| Prostate adenocarcinoma        | 26 (1.99%)                                | 1304               |
| Bladder cancer                 | 26 (1.14%)                                | 2282               |
| Invasive breast cancer         | 23 (1.2%)                                 | 1918               |
| Head and neck cancer           | 21 (1.39%)                                | 1512               |
| Esophagogastric adenocarcinoma | 18 (3.04%)                                | 592                |
| Skin cancer, non-melanoma      | 17 (3.15%)                                | 540                |

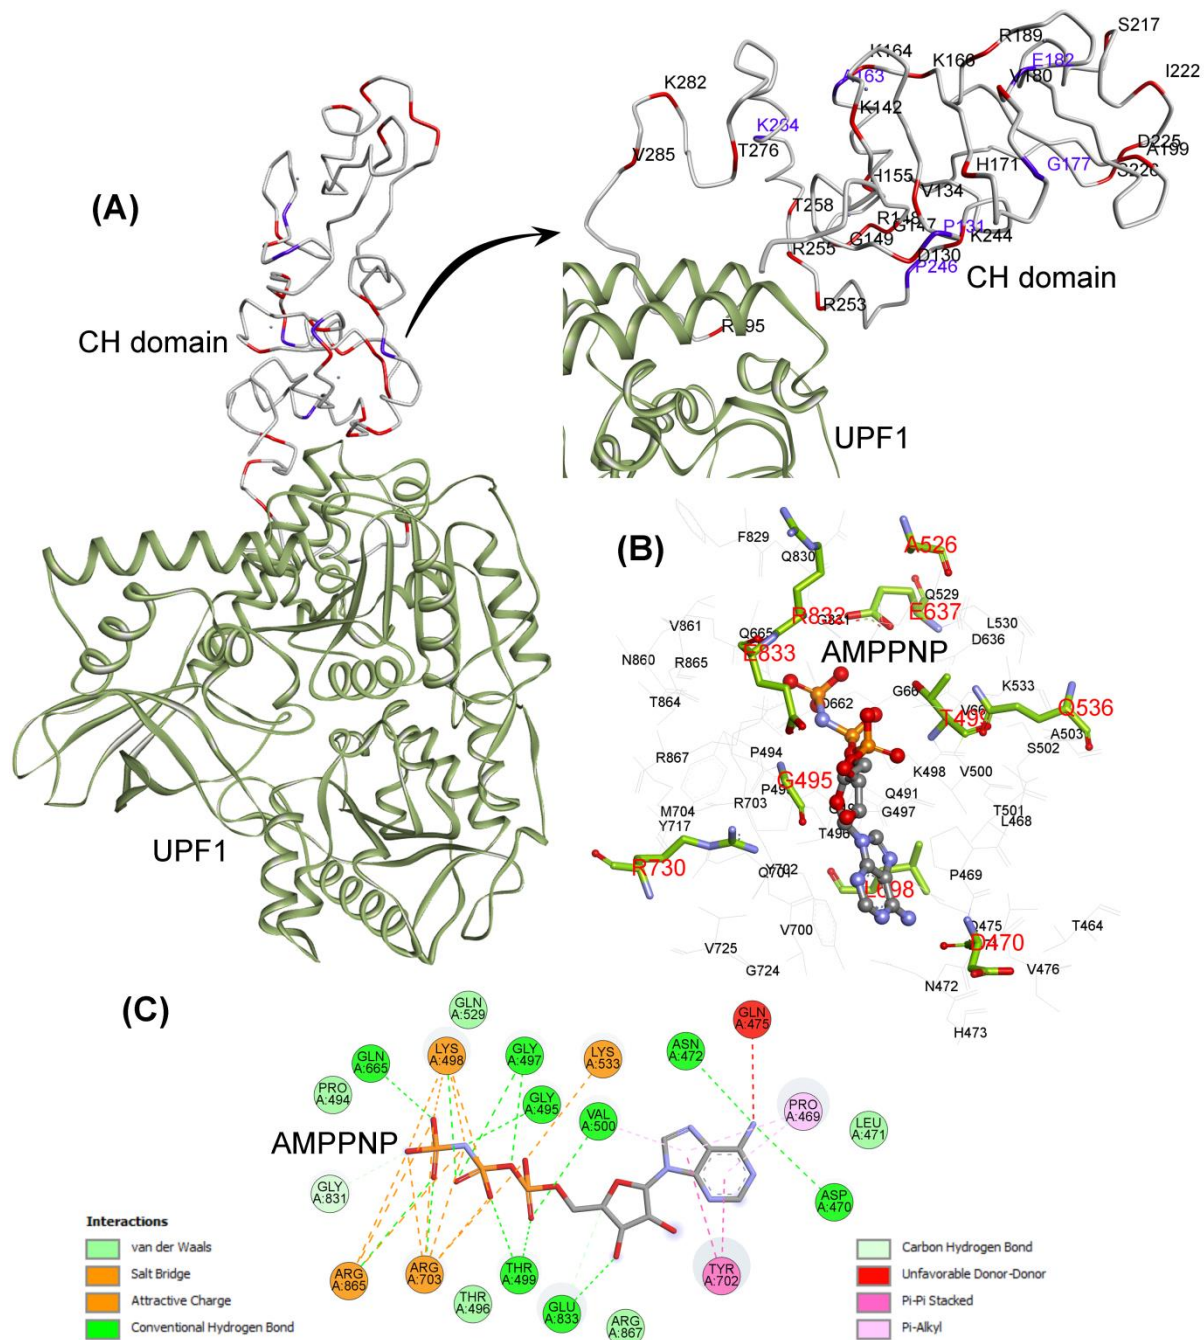

**Figure S2.** The UPF1 protein mutations analysis from the cBioPortal database (Cancer Discov.2012, 2, 401-404). **(A)** Residues from the CH-domain of the UPF1 protein that are mutated in different types of cancer (mutations with frequency  $\geq 2$  are in blue color). **(B)** UPF1 residues within 8 Å of AMPPNP (ATP binding site; PDB: 2GJK) are labelled, and residues found mutated in different cancer types are represented as stick (carbon atoms are colored in green) and labelled in red. (Color scheme: oxygen in red, carbon grey/green, hydrogen in silver, nitrogen in blue, and sulphur in orange). **(C)** 2D diagram representing different type of interactions between UPF1 and ATP analogue (AMPPNP).

**Table S2.** The intramolecular hydrogen bond interactions between CH-helicase domains of the UPF1 protein. Interactions with occupancy (Occup.)  $\geq 20\%$  are presented in this table.

| Apo    |          |        | UPF1-UPF2 complex |          |        | UPF1-ATP complex |          |        |
|--------|----------|--------|-------------------|----------|--------|------------------|----------|--------|
| CH     | Helicase | Occup. | CH                | Helicase | Occup. | CH               | Helicase | Occup. |
| Pro119 | Thr429   | 52.59% | Leu252            | Ala299   | 43.47% | Glu278           | Tyr300   | 58.18% |
| Leu293 | Tyr296   | 51.50% | Leu294            | Arg687   | 39.18% | Gln256           | Asn304   | 40.02% |
| Glu278 | Gln303   | 46.51% | Gln256            | Asp298   | 37.89% | Ala254           | Asp298   | 39.42% |
| Asp279 | Gln424   | 36.03% | Val292            | Gly679   | 29.91% | Leu293           | Gln682   | 38.92% |
| Arg253 | Tyr300   | 27.74% | Arg253            | Val437   | 29.61% | Leu252           | Ala299   | 38.22% |
| Tyr125 | Tyr300   | 27.64% | His291            | Gly679   | 26.32% | Lys116           | Thr429   | 24.55% |
| Arg253 | Ala431   | 26.45% | Arg255            | Asp298   | 20.94% | Leu293           | Tyr296   | 24.25% |
| Arg253 | Val437   | 24.75% | Glu278            | Asn304   | 20.64% | Arg253           | Ala431   | 20.86% |
| Glu278 | Gln424   | 23.25% | Arg253            | Tyr300   | 20.64% |                  |          |        |

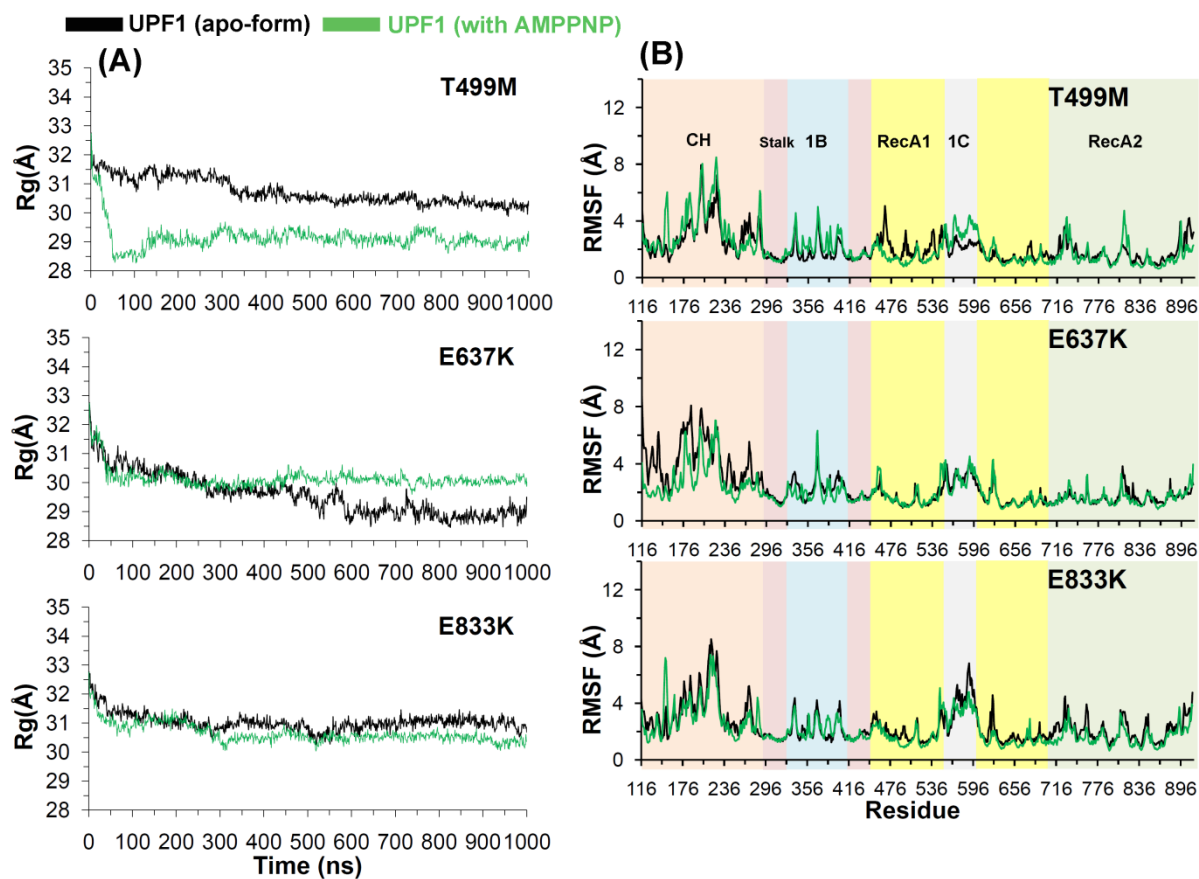

**Figure S3.** Structural analysis of the UPF1 ATP-site mutant systems: T499M, E637K, and E833K. **(A)** Radius of gyration profile (Rg), representing structural changes of UPF1 protein during the MD simulations. **(B)** RMSF analysis of the UPF1 protein showing fluctuations of residues in different simulated systems.

**Table S3.** Intermolecular H-bond interactions of the wild-type systems between UPF1-UPF2 or UPF1-AMPPNP, represented with the occupancy (Occup.) of a particular interaction over time frame (interactions  $\geq 10$  % occupancy are presented in this table).

| UPF1-UPF2 |         |        | UPF1-AMPPNP |        |
|-----------|---------|--------|-------------|--------|
| UPF1      | UPF2    | Occup. | UPF1        | Occup. |
| Val205    | Val1172 | 61.71% | Thr499      | 74.75% |
| Ser203    | Val1172 | 53.84% | Lys498      | 60.08% |
| Val205    | Leu1174 | 51.15% | Gly495      | 58.98% |
| Ser152    | Asp1110 | 44.37% | Arg703      | 27.05% |
| Asn190    | Asn1124 | 33.10% | Thr496      | 17.86% |
| Ala201    | His1198 | 27.42% | Lys533      | 17.07% |
| Gln260    | Glu1109 | 23.13% | Gly497      | 15.67% |
| Gln230    | Ala1195 | 21.64% | Arg730      | 12.97% |
| Gln234    | Gln1193 | 20.04% | Gly831      | 12.77% |
| Ser152    | Asp1110 | 19.64% |             |        |
| Leu207    | Leu1174 | 18.25% |             |        |
| Glu248    | Met1103 | 17.35% |             |        |
| Glu248    | Gly1104 | 16.35% |             |        |
| Gln228    | Asn1197 | 13.66% |             |        |
| Ser240    | Gln1193 | 11.27% |             |        |

**Table S4.** The intramolecular H-bond interactions between CH-helicase domains of the UPF1 protein from mutated systems: T499M, E637K, and E833K showing occupancy (Occup.) of particular interaction over time frame. Interaction  $\geq 20\%$  occupancy are presented in this table.

| Apo-form     |          |        | UPF1-ATP complex |          |        |
|--------------|----------|--------|------------------|----------|--------|
| CH           | Helicase | Occup. | CH               | Helicase | Occup. |
| <b>T499M</b> |          |        |                  |          |        |
| Gln256       | Asp298   | 64.17% | Leu293           | Tyr296   | 52.20% |
| Leu294       | Arg687   | 44.21% | Glu278           | Tyr300   | 50.00% |
| Leu252       | Ala299   | 42.51% | Val292           | Ala678   | 35.23% |
| Arg255       | Asp298   | 42.32% | Tyr125           | Tyr300   | 22.26% |
| Glu271       | Tyr300   | 35.93% | Glu278           | Gln303   | 21.06% |
| Leu293       | Tyr296   | 29.14% | Arg253           | Ala431   | 20.16% |
| Leu118       | Thr429   | 27.45% |                  |          |        |
| Arg253       | Ala431   | 24.75% |                  |          |        |
| Arg253       | Tyr300   | 23.15% |                  |          |        |
| Glu248       | Tyr442   | 21.56% |                  |          |        |
| Gln256       | Glu297   | 21.16% |                  |          |        |
| <b>E637K</b> |          |        |                  |          |        |
| Gln256       | Asp298   | 54.69% | Leu293           | Tyr296   | 45.11% |
| Glu278       | Gln303   | 47.01% | Arg253           | Val437   | 24.45% |
| Glu281       | Gln301   | 38.32% | Arg253           | Tyr300   | 22.95% |
| Gln290       | Lys677   | 28.14% | Asp279           | Tyr300   | 22.65% |
| Val292       | Gln682   | 28.04% | Gln256           | Asp298   | 21.86% |
| His129       | Tyr300   | 23.95% | Asp279           | Gln303   | 20.86% |
| <b>E833K</b> |          |        |                  |          |        |
| Thr258       | Glu297   | 63.67% | Tyr442           | Leu252   | 47.70% |
| Leu293       | Tyr296   | 57.88% | Gln256           | Asp298   | 44.41% |
| Gln290       | Asn304   | 52.30% | Leu293           | Tyr296   | 39.12% |
| Thr151       | Glu297   | 41.72% | Gln261           | Asp298   | 34.13% |
| Asn304       | Asp279   | 36.53% | Tyr316           | Glu287   | 33.93% |
| Asn304       | Pro283   | 34.13% | Gln682           | Leu293   | 33.33% |
| Gln261       | Asp298   | 32.34% | Lys674           | Glu287   | 30.24% |
| Gln303       | Asp279   | 31.84% | Leu277           | Tyr300   | 23.45% |
| Arg255       | Asp298   | 29.24% | Asp117           | Asp433   | 22.65% |
| Tyr300       | Glu278   | 27.84% | Tyr300           | Glu278   | 17.86% |

**Table S5.** The intermolecular H-bond interactions between UPF1-AMPPNP from mutated systems: T499M, E637K, and E833K with the occupancy (Occup.) of particular interaction over time frame (interaction  $\geq 10$  % occupancy are presented in this table).

| UPF1-AMPPNP |        |        |        |        |        |
|-------------|--------|--------|--------|--------|--------|
| T499M       |        | E637K  |        | E833K  |        |
| UPF1        | Occup. | UPF1   | Occup. | UPF1   | Occup. |
| Gly831      | 48.20% | Thr499 | 73.95% | Thr496 | 52.69% |
| Arg703      | 43.91% | Thr499 | 66.67% | Gly497 | 45.61% |
| Gln475      | 36.93% | Arg865 | 49.50% | Lys498 | 33.63% |
| Arg832      | 35.13% | Arg703 | 27.74% | Arg703 | 33.53% |
| Gln830      | 25.95% | Thr496 | 27.25% | Arg867 | 26.75% |
| Arg865      | 22.36% | Gly495 | 22.75% | Thr496 | 18.86% |
| Lys498      | 15.57% | Lys637 | 17.66% | Val500 | 12.97% |
| Gln529      | 13.77% | Gly497 | 16.37% | Lys833 | 12.38% |
| Asp470      | 10.88% | Lys533 | 10.88% | Gly495 | 12.18% |



**Table S6.** The intramolecular H-bond interactions between the CH-helicase domain of UPF1 from mutant model systems: K164R and R253W, representing occupancy (Occup.) of particular interaction over time frame. Interactions  $\geq 20\%$  occupancy are presented in this table.

| Apo-form     |          |        | UPF1-UPF2 complex |          |        |
|--------------|----------|--------|-------------------|----------|--------|
| CH           | Helicase | Occup. | CH                | Helicase | Occup. |
| <b>K164R</b> |          |        |                   |          |        |
| Gln261       | Glu297   | 53.89% | Gln256            | Asp298   | 63.61% |
| Leu293       | Tyr296   | 49.00% | Gln261            | Glu297   | 51.94% |
| Gln260       | Glu297   | 44.41% | Thr258            | Glu297   | 50.75% |
| Thr258       | Glu297   | 42.12% | Gln261            | Asp298   | 48.85% |
| Arg255       | Asp298   | 41.12% | Leu293            | Tyr296   | 48.65% |
| Arg253       | Val437   | 40.42% | Leu280            | Asn304   | 35.89% |
| Tyr300       | Asp279   | 36.73% | Arg253            | Ala431   | 35.19% |
| Asp130       | Glu434   | 34.73% | Gln260            | Glu297   | 31.61% |
| Ala259       | Glu297   | 25.15% | Asp279            | Tyr300   | 26.72% |
| Asn304       | Asp279   | 23.35% | Val292            | Gly679   | 26.22% |
|              |          |        | Leu294            | Arg687   | 25.92% |
| <b>R253W</b> |          |        |                   |          |        |
| Gln261       | Asp298   | 49.05% | Gln260            | Glu297   | 50.75% |
| Gln256       | Asp298   | 45.46% | Gln261            | Asp298   | 48.35% |
| Leu293       | Tyr296   | 43.47% | Arg255            | Glu434   | 44.27% |
| Gln290       | Asn304   | 38.88% | Thr258            | Asp298   | 43.67% |
| Leu252       | Ala299   | 30.01% | Asn150            | Glu297   | 38.58% |
| Glu278       | Asn304   | 27.82% | Asp279            | Tyr300   | 38.48% |
| Trp253       | Tyr300   | 26.52% | Gln261            | Gln301   | 20.84% |
| Thr258       | Glu297   | 23.93% |                   |          |        |
| Gln261       | Glu297   | 21.34% |                   |          |        |
| Glu278       | Tyr300   | 21.14% |                   |          |        |
| Leu118       | Asp433   | 21.14% |                   |          |        |
| Arg255       | Asp298   | 20.14% |                   |          |        |

**Table S7.** The intermolecular H-bond interactions between UPF1-UPF2 from mutated model systems: K164R and R253W, with their occupancy (Occup.) of particular interaction over time frame (interactions  $\geq 10$  % occupancy are presented).

| K164R  |         |        | R253W  |         |        |
|--------|---------|--------|--------|---------|--------|
| UPF1   | UPF2    | Occup. | UPF1   | UPF2    | Occup. |
| Ser152 | Asp1110 | 56.33% | Thr151 | Asp1110 | 65.20% |
| Val205 | Val1172 | 52.74% | Ser152 | Asp1110 | 55.63% |
| Val205 | Leu1174 | 45.16% | Ser217 | Arg1128 | 53.14% |
| Asn150 | Met1103 | 36.89% | Val205 | Val1172 | 52.94% |
| Val180 | Lys1177 | 35.79% | Leu207 | Leu1174 | 52.44% |
| Ser203 | Val1172 | 35.29% | Ser203 | Val1172 | 48.55% |
| Phe192 | Asn1124 | 35.29% | Val205 | Leu1174 | 48.26% |
| Val180 | Thr1175 | 32.70% | Ser226 | Arg1128 | 43.87% |
| Asn150 | Cys1107 | 29.01% | Ser215 | Arg1128 | 39.08% |
| Glu182 | Lys1177 | 23.33% | Gln211 | Asn1124 | 38.29% |
| Glu182 | Gly1178 | 20.14% | Ser227 | His1198 | 35.89% |
| Ser152 | Glu1109 | 18.84% | Gln216 | Arg1128 | 34.90% |
| Asn190 | Asn1124 | 16.45% | Ser215 | Gln1127 | 34.00% |
| Leu193 | Asn1124 | 14.56% | Glu178 | Gln1181 | 33.60% |
| Gln230 | Leu1194 | 13.26% | Gln211 | Gln1127 | 30.71% |
| Asn150 | Glu1109 | 13.06% | Glu178 | Asn1179 | 24.53% |
| Arg164 | Gln1127 | 10.87% | Glu178 | Lys1180 | 23.83% |
| Gln228 | Ser1191 | 10.77% | Arg210 | Gln1127 | 23.23% |
|        |         |        | His448 | Gly1104 | 23.03% |
|        |         |        | Gln230 | Ala1196 | 21.93% |
|        |         |        | Lys172 | Gln1181 | 20.34% |
|        |         |        | Leu170 | Gln1181 | 13.26% |
|        |         |        | Glu178 | Gln1182 | 11.57% |
|        |         |        | Ser218 | Gln1127 | 10.67% |
|        |         |        | Ala259 | Asp1110 | 10.67% |

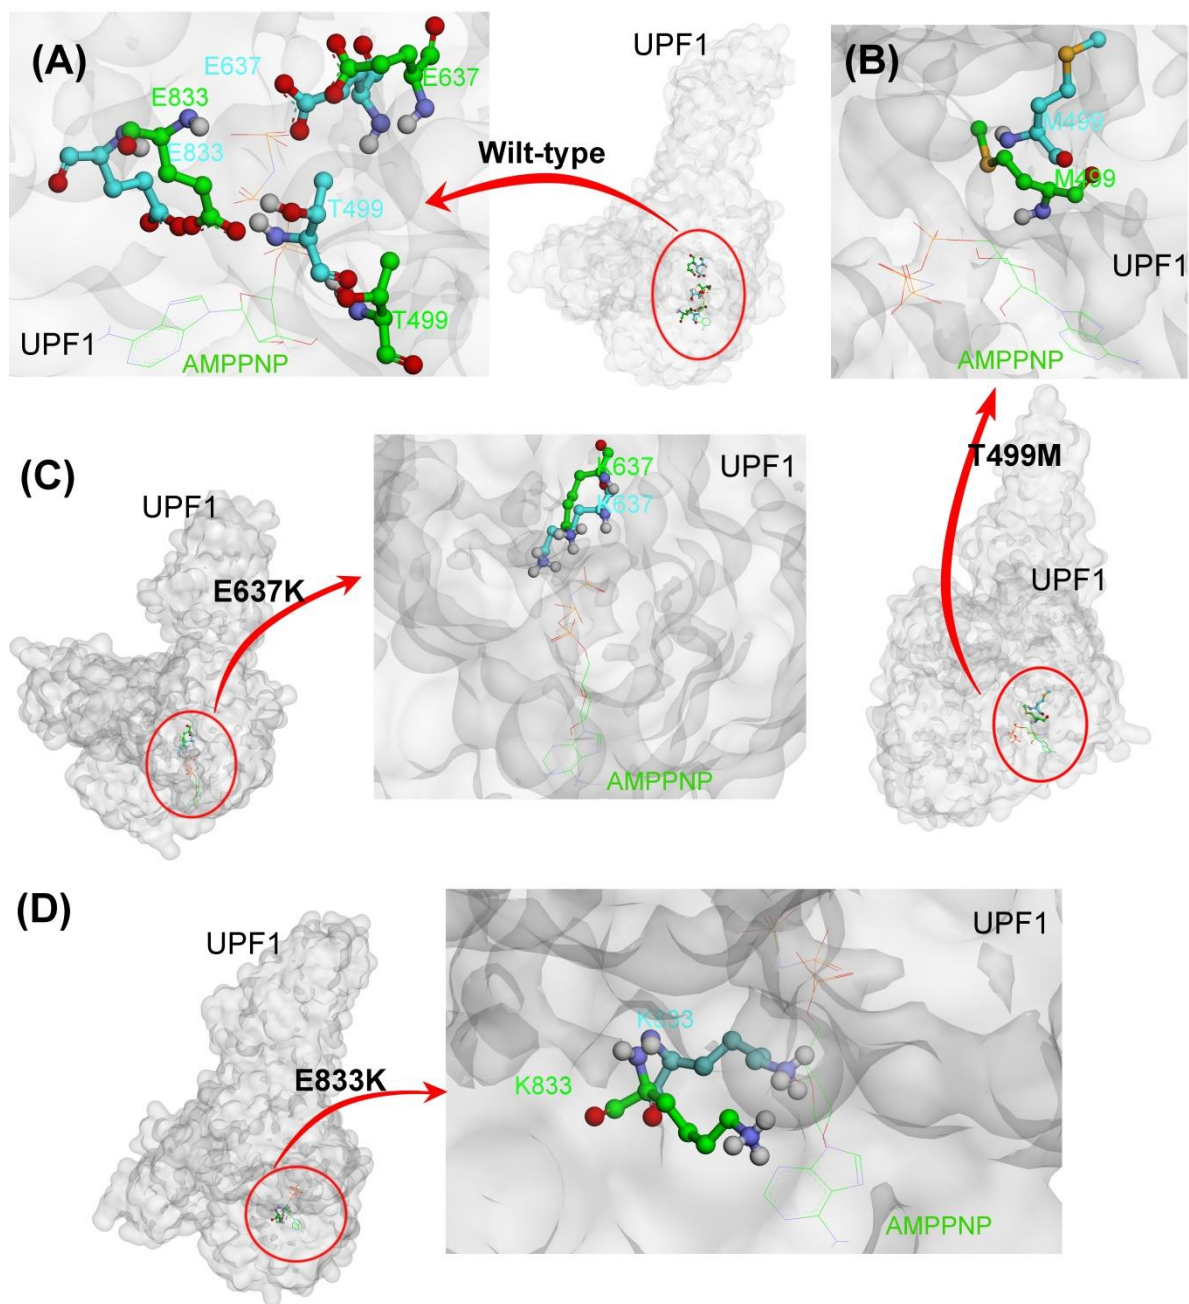

**Figure S4.** Binding mode of the AMPPNP molecule and the dynamics of residues in apo-form (blue color) and UPF1-AMPPNP complexes (green color) analysed from the trajectory of MD simulations for models: (A) wild-type, (B) T499M, (C) E637K, and (D) E833K. Color scheme: carbon in blue/green, oxygen in red, hydrogen in silver, nitrogen in blue, and sulphur in orange.

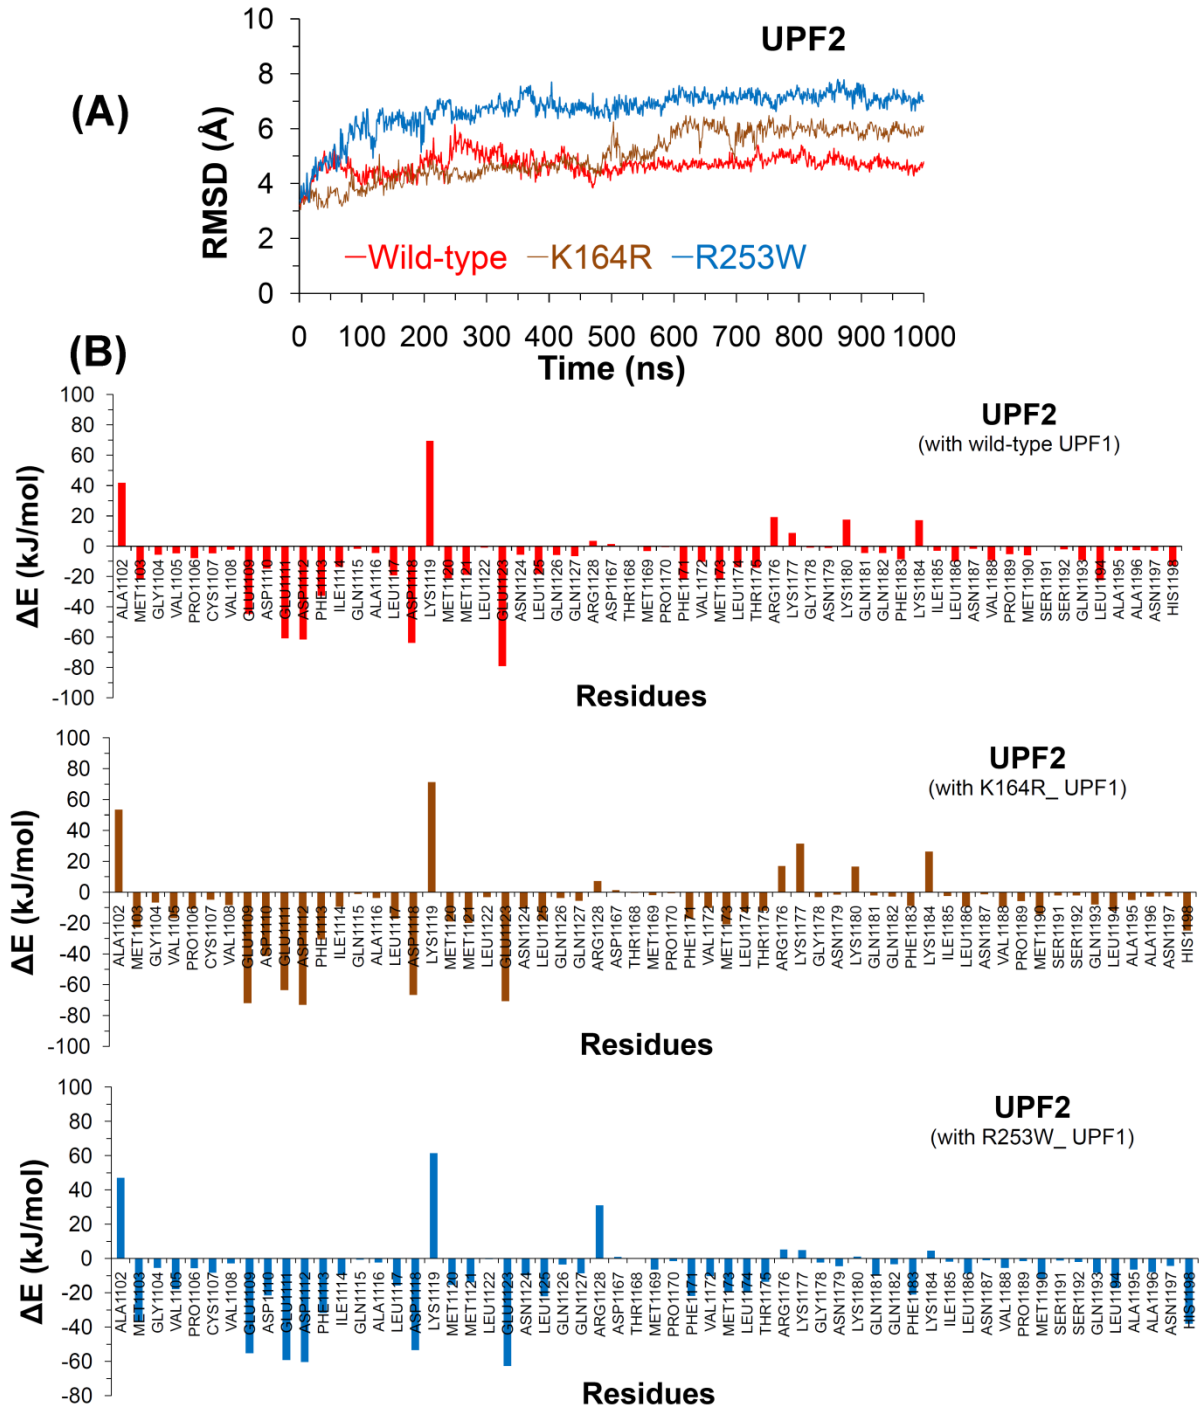

**Figure S5.** Structural analysis of the UPF2 protein from the wild-type/K164R/R253W UPF1-UPF2 complexes. **(A)** RMSDs representing structural changes of UPF2 protein. **(B)** Energy contribution of the UPF2 residues in binding with UPF1 computed using MM-PBSA.

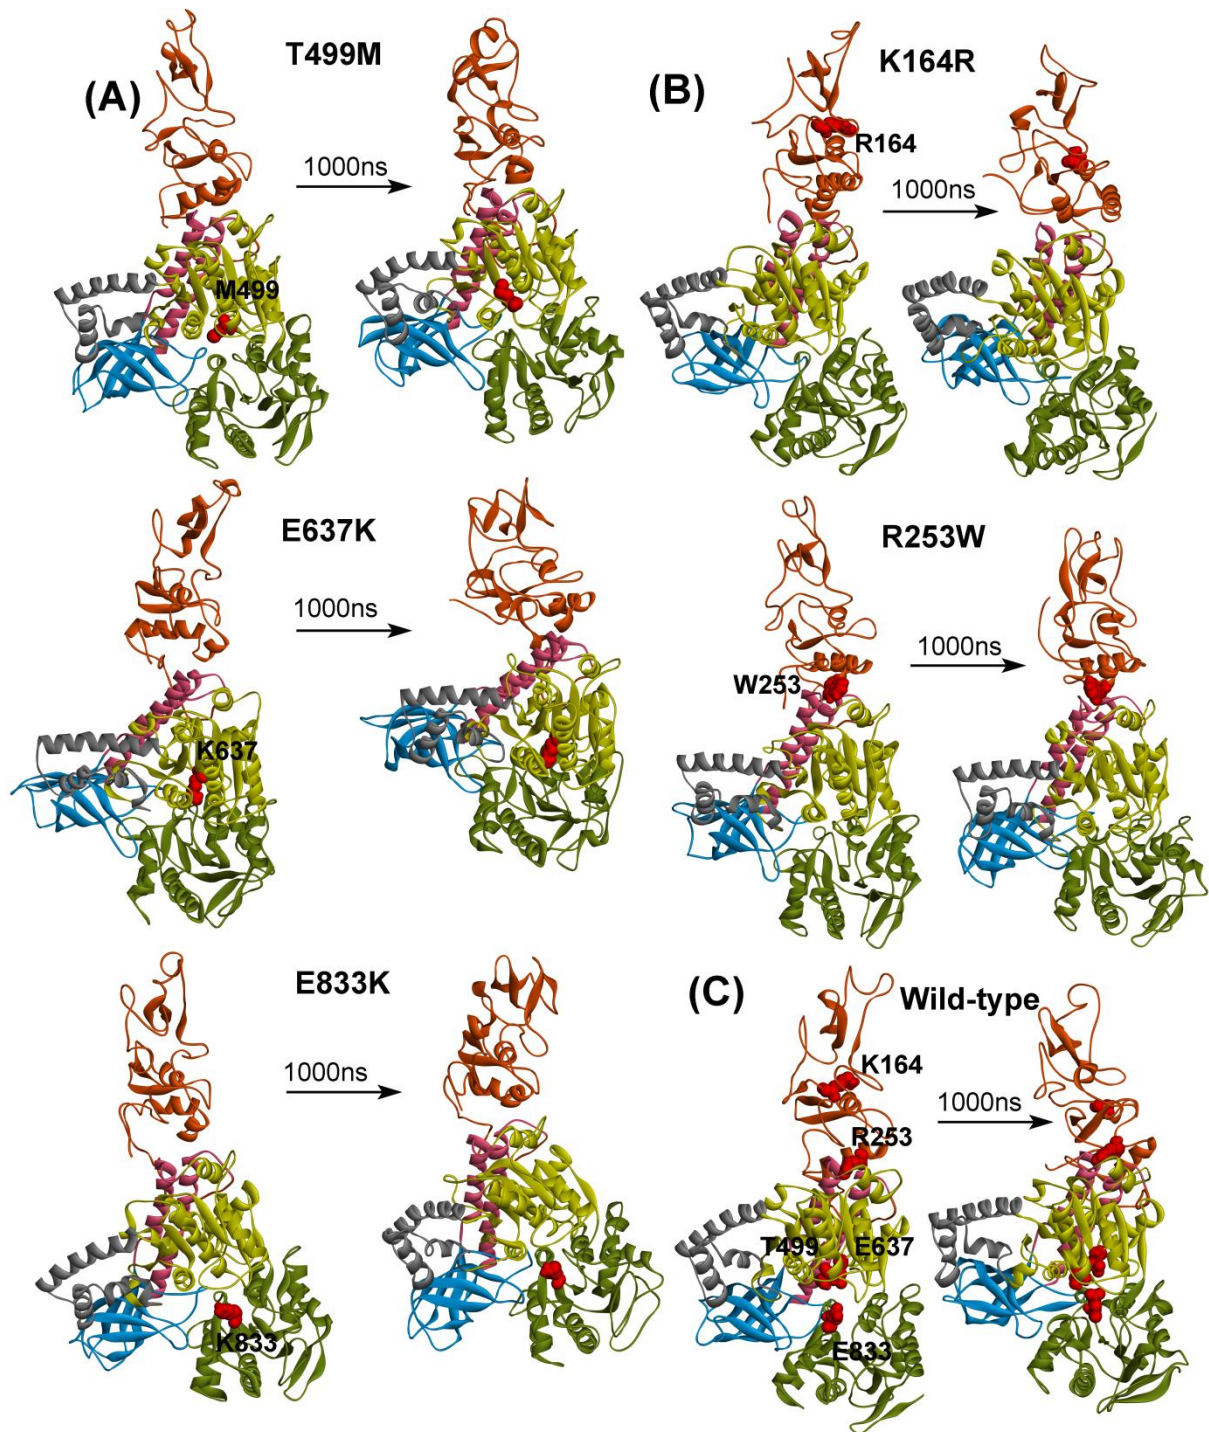

**Figure S6.** Structural changes of the UPF1 protein in apo-form obtained from the beginning and the end of MD simulations. **(A)** and **(B)** UPF1 ATP-site mutants T499M, E637K, and E833K; and UPF2-binding site mutants K164R and R253W. **(C)** Wild-type UPF1 protein conformation. Different domains of the UPF1 protein are colored as per Figure 1 in the main text.



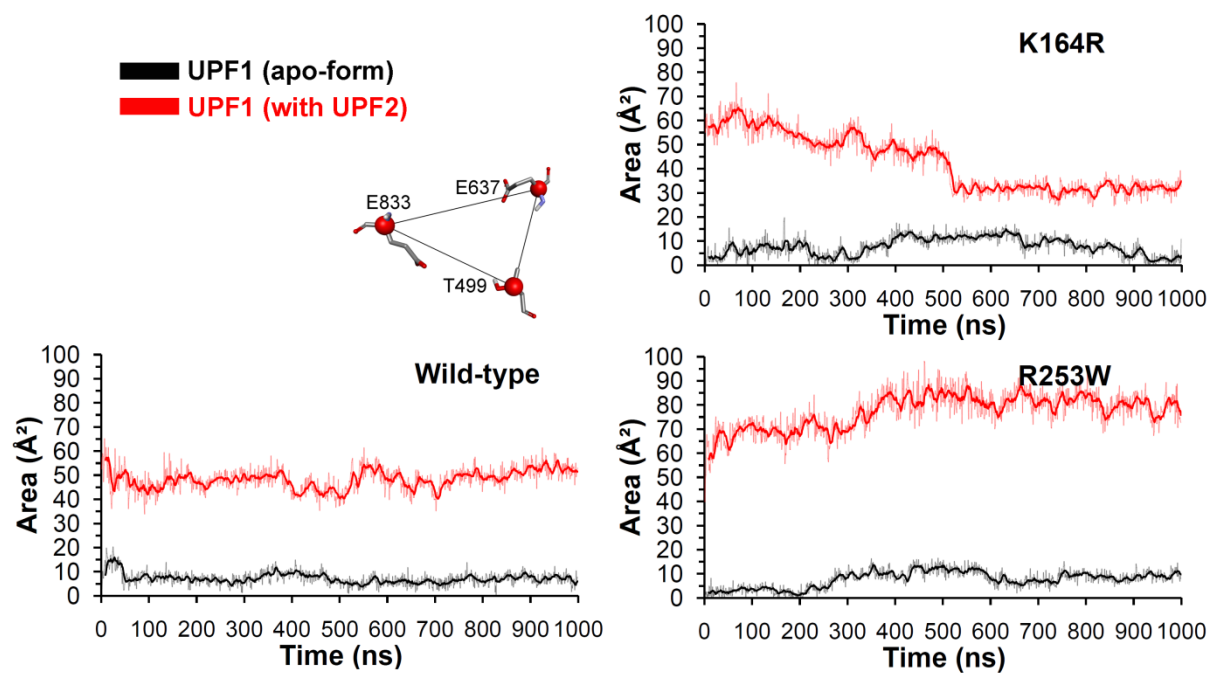

**Figure S7.** Area analysis of structural changes in the ATP-binding region of the UPF1 protein in wild-type, K164R, and R253W mutant model systems. The three residues (or triangle) selected for area calculation was based on  $C\alpha$  atoms of T499, E637, and E833 (black lines are for apo-form and red lines for UPF1-UPF2 complexes). The dark lines represents trend with a moving average of area with a period of 10 ns.

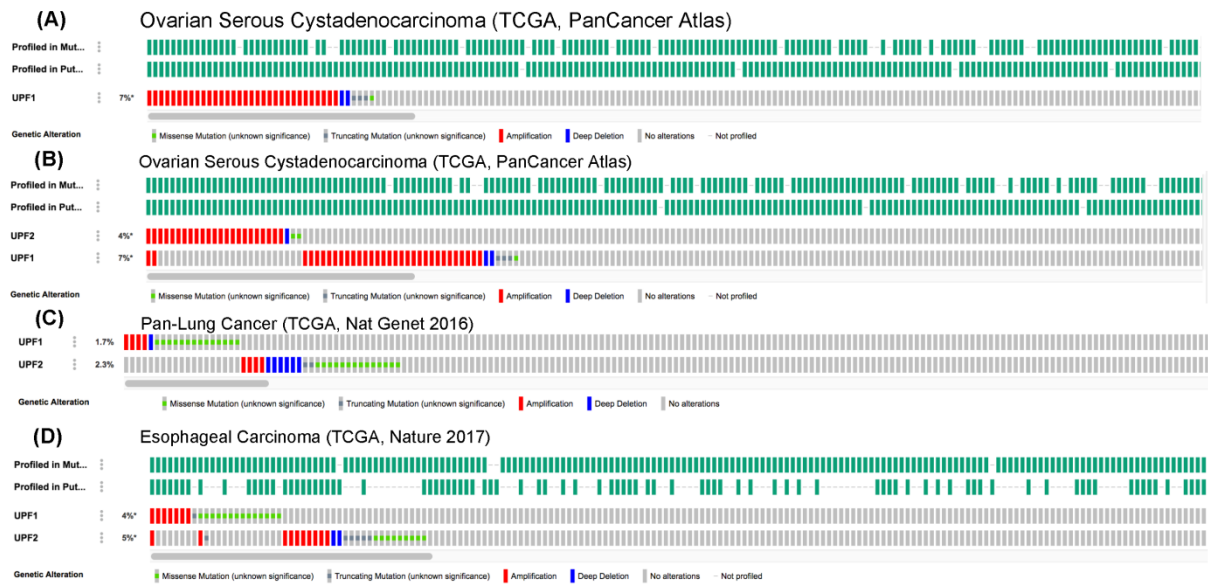

**Figure S8.** The UPF1 gene altered in ovarian cancer, lung cancer, and esophageal squamous cancer data retrieved from the cBioPortal database (Cancer Discov.2012, 2, 401-404). **(A)** UPF1 mutation frequency in ovarian serous cystadenocarcinoma (TCGA, PanCancer Atlas). **(B)** Amplification dominates for UPF1 or UPF2 in ovarian serous cystadenocarcinoma (TCGA, PanCancer Atlas). **(C)** Mutation dominates for UPF1 or UPF2 in pan-lung cancer (TCGA, Nat Genet 2016). **(D)** Mutation dominates for UPF1 or UPF2 in Esophageal Carcinoma (TCGA, Nature 2017).
